# Supplementary material
Source: publisher figshare collection journal article supplement (https://rs.figshare.com/ndownloader/files/23890693)
Supplement: Supplementary file 1 [file 23890693]

## Sheet: Analysis 3 valuation
Equation S3
crop	region	P_pollinator_HB	P_pollinator_WB	V_crop_state	sum_V_crop_state	P_pollinator_US_HB	P_pollinator_US_WB
almond	CA	1	0	6442700000	6442700000	1	0
apple	MI	0.46657	0.53343	2.32133e+08	3.24967e+08	0.492847	0.507153
apple	PA	0.558555	0.441445	9.28333e+07	3.24967e+08	0.492847	0.507153
blueberry	FL	0.738413	0.261587	83156000	3.90476e+08	0.904984	0.0950157
blueberry	MI	0.941238	0.0587618	170968000	3.90476e+08	0.904984	0.0950157
blueberry	OR	0.961113	0.0388875	1.36352e+08	3.90476e+08	0.904984	0.0950157
cherry_sweet	WA	0.723311	0.276689	463149000	463149000	0.723311	0.276689
cherry_tart	MI	0.509629	0.490371	6.64283e+07	6.78473e+07	0.509126	0.490874
cherry_tart	PA	0.485578	0.514422	1419000	6.78473e+07	0.509126	0.490874
pumpkin	PA	0.162195	0.837805	1.52147e+07	1.52147e+07	0.162195	0.837805
watermelon	CA	0.925967	0.0740335	8.46133e+07	1.9355e+08	0.684932	0.315068
watermelon	FL	0.497716	0.502284	1.08936e+08	1.9355e+08	0.684932	0.315068
Equation S4
crop	region	P_pollinator_US_HB	P_pollinator_US_WB	V_crop_US	D	V_pollinator_US_HB	V_pollinator_US_WB
almond	US	1	0	6442700000	0.65	0	4187755000
apple	US	0.492847	0.507153	3.20082e+09	0.65	1.05515e+09	1.02538e+09
blueberry	US	0.904984	0.0950157	8.0971e+08	0.65	5.00079e+07	4.76303e+08
cherry_sweet	US	0.723311	0.276689	804372400	0.65	1.44664e+08	3.78178e+08
cherry_tart	US	0.509126	0.490874	1.01266e+08	0.65	3.23109e+07	3.35123e+07
pumpkin	US	0.162195	0.837805	1.26513e+08	0.95	1.00693e+08	1.94938e+07
watermelon	US	0.684932	0.315068	487522000	0.95	1.45922e+08	3.17224e+08
crop	region	P_pollinator_US_HB	P_pollinator_US_WB	V_crop_US	D	V_pollinator_US_HB	V_pollinator_US_WB

## Sheet: Supp Analysis 1 valuation
Equation S5
crop	region	VCA_state	A_state	sum_A_state	A_US	TVC_US
almond	CA	2151	870000	870000	870000	1871370000
apple	MI	3794.34	34166.7	54166.7	318977	1.21031e+09
apple	PA	3794.34	20000	54166.7	318977	1.21031e+09
blueberry	FL	8016.67	4700	34033.3	85203.3	6.06244e+08
blueberry	MI	7420	19700	34033.3	85203.3	6.06244e+08
blueberry	OR	6052.3	9633.33	34033.3	85203.3	6.06244e+08
cherry_sweet	WA	6495.18	35000	35000	89876.7	5.83765e+08
cherry_tart	MI	2079.67	28100	28600	38016.7	7.90621e+07
cherry_tart	PA	2079.67	500	28600	38016.7	7.90621e+07
pumpkin	PA	1672	5666.67	5666.67	46766.7	7.81939e+07
watermelon	CA	6885.46	10533.3	30833.3	113577	4.73445e+08
watermelon	FL	2758.72	20300	30833.3	113577	4.73445e+08
Equation S6
crop	region	TPV_US	TVC_US	NPV_US
almond	US	6442700000	1871370000	4571330000
apple	US	3.20082e+09	1.21031e+09	1.99051e+09
blueberry	US	8.0971e+08	6.06244e+08	2.03466e+08
cherry_sweet	US	804372400	5.83765e+08	2.20607e+08
cherry_tart	US	1.01266e+08	7.90621e+07	2.22042e+07
pumpkin	US	1.26513e+08	7.81939e+07	48318800
watermelon	US	487522000	4.73445e+08	1.40773e+07
Equation S7
crop	region	P_pollinator_HB	P_pollinator_WB	NPV_crop_state	sum_NPV_crop_state	P_pollinator_US_HB	P_pollinator_US_WB
almond	CA	1	0	4571330000	4571330000	1	0
apple	MI	0.46657	0.53343	1.02493e+08	1.1944e+08	0.479621	0.520379
apple	PA	0.558555	0.441445	1.69465e+07	1.1944e+08	0.479621	0.520379
blueberry	FL	0.738413	0.261587	45477651	1.48319e+08	0.889506	0.110494
blueberry	MI	0.941238	0.0587618	24794000	1.48319e+08	0.889506	0.110494
blueberry	OR	0.961113	0.0388875	7.80478e+07	1.48319e+08	0.889506	0.110494
cherry_sweet	WA	0.723311	0.276689	235817700	235817700	0.723311	0.276689
cherry_tart	MI	0.509629	0.490371	7.98961e+06	8.36877e+06	0.508539	0.491461
cherry_tart	PA	0.485578	0.514422	379165	8.36877e+06	0.508539	0.491461
pumpkin	PA	0.162195	0.837805	5740000	5740000	0.162195	0.837805
watermelon	CA	0.925967	0.0740335	12086488	6.50208e+07	0.577322	0.422678
watermelon	FL	0.497716	0.502284	5.29343e+07	6.50208e+07	0.577322	0.422678
Equation S8
crop	region	P_pollinator_US_HB	P_pollinator_US_WB	NPV_US	D	V_pollinator_US_HB	V_pollinator_US_WB
almond	US	1	0	4571330000	0.65	2971364500	0
apple	US	0.479621	0.520379	1.99051e+09	0.65	6.20549e+08	6.73282e+08
blueberry	US	0.889506	0.110494	2.03466e+08	0.65	1.17639e+08	1.46131e+07
cherry_sweet	US	0.723311	0.276689	2.20607e+08	0.65	1.03719e+08	3.96757e+07
cherry_tart	US	0.508539	0.491461	2.22042e+07	0.65	7.33961e+06	7.09312e+06
pumpkin	US	0.162195	0.837805	48318800	0.95	7.44523e+06	3.84576e+07
watermelon	US	0.577322	0.422678	1.40773e+07	0.95	7.72075e+06	5.65264e+06

## Sheet: Literature valuations
crop	region	US_value_HB_LoseyVaughn2006	US_value_WB_LoseyVaughn2006	US_value_HB_Calderone2012	US_value_WB_Calderone2012
almond	US	1442672000	0	3085449500	0
apple	US	1837590579	204176731	2172586900	2.41403e+08
blueberry	US	223627041	24847449	580534090	6.45033e+07
cherry_sweet	US	340638045	33683815	634916700	70550648
cherry_tart	US	65989363	6530667	35653600	3963202
pumpkin	US	18471354	78780196	11402630	1.02609e+08
watermelon	US	378430899	28479891	336948260	37438454
*Note: all values have been adjusted to 2015 dollars to match our analysis
